# Supplementary material for: Understanding Suicide Clusters Through Exploring Self-Harm Behaviors
Source: Atypon-hosted journal article supplement (doi:10.1027/0227-5910/a000930), 2023-10-31
Supplement: 0227-5910_a000930_esm3.pdf [file 0227-5910_a000930_esm3.pdf]

### Electronic Supplementary Material 3

Table E1. Datasets used in this study.

| Database                                | Description                                                                                                                                                                                  | Coverage                                        |
|-----------------------------------------|----------------------------------------------------------------------------------------------------------------------------------------------------------------------------------------------|-------------------------------------------------|
| Welsh Demographic Service               | An administrative register of all individuals in Wales that use NHS services, containing anonymised demographics and GP practice registration history with anonymised residential data       | Wales                                           |
| General Practice Database               | Primary care records with diagnoses, symptoms, investigations, prescribed medication, referrals, coded hospital contacts, and test results coded using Read Codes v2                         | 77% (333/432) of all general practices in Wales |
| Patient Episode Database for Wales      | Clinical information (specialty and diagnoses) of all NHS Wales hospital admissions (inpatient and day cases) – diagnostic information coded using ICD-10 codes.                             | Wales                                           |
| Office for National Statistics – Deaths | Death register of all deaths and causes in Wales, coded using International Classification of Diseases (ICD), version 10 codes, derived from information collected at registration of death. | Wales                                           |

Table E2. Sociodemographics and responses to the emergency department (ED) mental health assessment for the ED dataset ascertained during the suicide cluster (DC) or one year before suicide cluster (BC) period.

| Characteristics                                                    | Category                                | 1 year before suicide cluster (BC)<br>(n = 43) |       |             | During suicide cluster (DC)<br>(n = 86) |       |             |
|--------------------------------------------------------------------|-----------------------------------------|------------------------------------------------|-------|-------------|-----------------------------------------|-------|-------------|
|                                                                    |                                         | Person                                         |       |             | Person                                  |       |             |
|                                                                    |                                         | count                                          | %     | 95% CI      | count                                   | %     | 95% CI      |
| Sex                                                                | Male                                    | 15                                             | 34.9  | 21.5 , 51.0 | 32                                      | 37.2  | 27.2 , 48.4 |
|                                                                    | Female                                  | 28                                             | 65.1  | 49.0 , 78.5 | 54                                      | 62.8  | 51.6 , 72.8 |
| Age (years)                                                        | 0-14                                    | <5                                             | <5.0  | 0.0 , <15.0 | <5                                      | <5.0  | 0.0 , <10.0 |
|                                                                    | 15-34                                   | 26                                             | 60.5  | 44.5 , 74.6 | 56                                      | 65.1  | 54.0 , 74.9 |
|                                                                    | 35-54                                   | 13                                             | 30.2  | 17.7 , 46.3 | 23                                      | 26.7  | 18.0 , 37.6 |
|                                                                    | ≥ 55                                    | <5                                             | <10.0 | 0.0 , <25.0 | <10                                     | <10.0 | 0.0 , <15.0 |
| WIMD <sup>a</sup> quintile<br>&<br>urban/rural indicator           | Q1                                      | <5                                             | <10.0 | 0.0 , <25.0 | 8                                       | 9.3   | 4.4 , 18.0  |
|                                                                    | Q2                                      | 9                                              | 20.9  | 10.6 , 36.5 | 13                                      | 15.1  | 8.6 , 24.8  |
|                                                                    | Q3                                      | <5                                             | <10.0 | 0.0 , <25.0 | 5                                       | 5.8   | 2.2 , 13.7  |
|                                                                    | Q4                                      | 12                                             | 27.9  | 15.8 , 43.9 | 15                                      | 17.4  | 10.4 , 27.5 |
|                                                                    | Q5 (most deprived)                      | 14                                             | 32.6  | 19.5 , 48.7 | 39                                      | 45.3  | 34.7 , 56.4 |
|                                                                    | Urban                                   | 32                                             | 74.4  | 58.5 , 86.0 | 51                                      | 59.3  | 48.2 , 69.6 |
|                                                                    | Rural                                   | <15                                            | <25.0 | 0.0 , <40.0 | 29                                      | 33.7  | 24.1 , 44.8 |
|                                                                    | Unknown LSOA <sup>b</sup>               | <5                                             | <5.0  | 0.0 , <15.0 | 6                                       | 7.0   | 2.9 , 15.1  |
| Marital status                                                     | Single                                  | 21                                             | 48.8  | 33.6 , 64.3 | 35                                      | 40.7  | 30.4 , 51.8 |
|                                                                    | Separated/Divorced/Widowed              | <10                                            | <15.0 | 0.0 , <30.0 | 16                                      | 18.6  | 11.3 , 28.8 |
|                                                                    | Partnered/Married                       | 14                                             | 32.6  | 19.5 , 48.7 | 26                                      | 30.2  | 21.0 , 41.2 |
|                                                                    | Unknown                                 | <5                                             | <5.0  | 0.0 , <20.0 | 9                                       | 10.5  | 5.2 , 19.4  |
| Household status                                                   | Lives alone                             | 12                                             | 27.9  | 15.8 , 43.9 | 12                                      | 14.0  | 7.7 , 23.5  |
|                                                                    | With lone parent                        | <5                                             | <5.0  | 0.0 , <15.0 | 7                                       | 8.1   | 3.6 , 16.6  |
|                                                                    | With parents                            | 11                                             | 25.6  | 14.0 , 41.5 | 24                                      | 27.9  | 19.0 , 38.8 |
|                                                                    | With partner/spouse                     | 12                                             | 27.9  | 15.8 , 43.9 | 24                                      | 27.9  | 19.0 , 38.8 |
|                                                                    | With friends/relatives                  | <5                                             | <5.0  | 0.0 , <20.0 | 9                                       | 10.5  | 5.2 , 19.4  |
|                                                                    | Others <sup>c</sup> & unknown           | 5                                              | 11.6  | 4.4 , 25.9  | 10                                      | 11.6  | 6.0 , 20.8  |
| Reason for visit                                                   | Self-harm with suicidal intent          | 15                                             | 34.9  | 21.5 , 51.0 | 28                                      | 32.6  | 23.1 , 43.6 |
|                                                                    | Non-suicidal self-harm                  | 13                                             | 30.2  | 17.7 , 46.3 | 30                                      | 34.9  | 25.1 , 46.0 |
|                                                                    | Self-harm with suicidal intent          | 15                                             | 34.9  | 21.5 , 51.0 | 27                                      | 31.4  | 22.1 , 42.4 |
|                                                                    | Others <sup>c</sup>                     | 0                                              | 0.0   | 0.0 , 0.0   | <5                                      | <5.0  | 0.0 , <10.0 |
|                                                                    | Unknown                                 | 0                                              | 0.0   | 0.0 , 0.0   | <5                                      | <5.0  | 0.0 , <10.0 |
| Suicidal intent &<br>future suicidal<br>ideation risk <sup>e</sup> | Suicidal intent                         | 17                                             | 39.5  | 25.4 , 55.2 | 32                                      | 37.2  | 27.2 , 48.4 |
|                                                                    | Future suicidal ideation risk           | 11                                             | 25.6  | 14.0 , 41.5 | 15                                      | 17.4  | 10.4 , 27.5 |
| SAD score                                                          | Consider discharge (0-5)                | 25                                             | 58.1  | 42.2 , 72.6 | 64                                      | 74.4  | 63.7 , 82.9 |
|                                                                    | Refer to psychiatric consultation (6-8) | 12                                             | 27.9  | 15.8 , 43.9 | 14                                      | 16.3  | 9.5 , 26.1  |
|                                                                    | Likely require hospital admission (> 8) | <10                                            | <15.0 | 0.0 , <30.0 | 8                                       | 9.3   | 4.4 , 18.0  |
|                                                                    | Unknown                                 | <5                                             | <5.0  | 0.0 , <15.0 | 0                                       | 0.0   | 0.0 , 0.0   |

General footnote: Data are masked to avoid disclosure of small counts (<5) or secondary disclosure of counts in other categories containing small counts

<sup>a</sup> Welsh Index of Multiple Deprivation

<sup>b</sup> Lower Super Output Area

<sup>c</sup> Others include live in care home/safe house/foster care/hostel/supported housing/women's refuge, and homeless

<sup>d</sup> Others include heroin overdose without suicidal intent, acute delirium, depression and anxiety (without suicidal intent), and violence/aggression/erratic behaviour/intoxication

<sup>e</sup> Column percentages may not add up to 100% for non-mutually exclusive groups

Table E3. Summary of Fisher's exact tests, likelihood ratio tests and Bayes factor for comparing sample characteristics for the ED dataset in Table E2.

| Characteristics               | Tests of association ( <i>p</i> -value) |                       | Bayes factor       |                                |
|-------------------------------|-----------------------------------------|-----------------------|--------------------|--------------------------------|
|                               | Fisher's exact test                     | Likelihood ratio test | Range <sup>a</sup> | Evidence category <sup>b</sup> |
| Sex                           | 0.848                                   | 0.796                 | 0.152 - 0.400      | - <sup>c</sup>                 |
| Age                           | 0.918                                   | 0.963                 | 0.011 - 0.062      | - <sup>c</sup>                 |
| WIMD <sup>d</sup> quintile    | 0.427                                   | 0.397                 | 0.044 - 0.290      | - <sup>c</sup>                 |
| Urban/rural indicator         | 0.249                                   | 0.183                 | 0.178 - 0.461      | - <sup>c</sup>                 |
| Marital status                | 0.619                                   | 0.549                 | 0.053 - 0.206      | - <sup>c</sup>                 |
| Household status              | 0.380                                   | 0.307                 | 0.041 - 0.470      | - <sup>c</sup>                 |
| Reason for visit              | 0.928                                   | 0.764                 | 0.014 - 0.049      | - <sup>c</sup>                 |
| Method of self-harm           | 0.623                                   | 0.294                 | 0.016 - 0.173      | - <sup>c</sup>                 |
| Suicidal intent               | 0.849                                   | 0.798                 | 0.155 - 0.406      | - <sup>c</sup>                 |
| Future suicidal ideation risk | 0.352                                   | 0.284                 | 0.338 - 0.593      | - <sup>c</sup>                 |
| SAD score                     | 0.128                                   | 0.150                 | 0.071 - 0.623      | - <sup>c</sup>                 |

<sup>a</sup> Ranges are given based of estimations corresponding to the Poisson, joint multinomial, independent multinomial and hypergeometric sampling schemes

<sup>b</sup> Evidence in favor of the alternative hypothesis (dependence of variables) unless otherwise noted

<sup>c</sup> Bayes factor <1, evidence in favor of the null hypothesis (independence of variables)

<sup>d</sup> Welsh Index of Multiple Deprivation

Table E4. Self-harm and clinical characteristics of ED dataset ascertained during the suicide cluster (DC) or one year before suicide cluster (BC) period.

| Characteristics                                                  | Category                         | 1 year before suicide cluster (BC)<br>(n = 43) |             |                    | During suicide cluster (DC)<br>(n = 86) |            |                   |             |
|------------------------------------------------------------------|----------------------------------|------------------------------------------------|-------------|--------------------|-----------------------------------------|------------|-------------------|-------------|
|                                                                  |                                  | Person<br>count                                | %           | 95% CI             | Person<br>count                         | %          | 95% CI            |             |
| Self-harm during<br>ascertainment period                         | Primary care                     | 22                                             | 51.2        | 35.7 , 66.4        | 46                                      | 53.5       | 42.5 , 64.2       |             |
|                                                                  | Secondary care                   | <b>14</b>                                      | <b>32.6</b> | <b>19.5 , 48.7</b> | <b>6</b>                                | <b>7.0</b> | <b>2.9 , 15.1</b> |             |
|                                                                  | ED mental health assessment only | 15                                             | 34.9        | 21.5 , 51.0        | 35                                      | 40.7       | 30.4 , 51.8       |             |
| Self-harm method during<br>ascertainment period <sup>a</sup>     | Overdose/Poisoning               | 38                                             | 88.4        | 74.1 , 95.6        | 68                                      | 79.1       | 68.7 , 86.8       |             |
|                                                                  | Hanging/Strangling               | <5                                             | <5.0        | 0.0 , <15.0        | <5                                      | <5.0       | 0.0 , <15.0       |             |
|                                                                  | Cutting                          | 8                                              | 18.6        | 8.9 , 33.9         | 14                                      | 16.3       | 9.5 , 26.1        |             |
|                                                                  | Others/Unknown                   | 12                                             | 27.9        | 15.8 , 43.9        | 26                                      | 30.2       | 21.0 , 41.2       |             |
| Charlson comorbidity index during history<br>period <sup>d</sup> | 0                                | 30                                             | 69.8        | 53.7 , 82.3        | 63                                      | 73.3       | 62.4 , 82.0       |             |
|                                                                  | ≥ 1                              | 13                                             | 30.2        | 17.7 , 46.3        | 23                                      | 26.7       | 18.0 , 37.6       |             |
| History of                                                       | Conditions <sup>b</sup>          | Self-harm                                      | 29          | 67.4               | 51.3 , 80.5                             | 50         | 58.1              | 47.0 , 68.5 |
|                                                                  |                                  | All mental health                              | 31          | 72.1               | 56.1 , 84.2                             | 57         | 66.3              | 55.2 , 75.9 |
|                                                                  |                                  | Common mental disorders                        | 28          | 65.1               | 49.0 , 78.5                             | 50         | 58.1              | 47.0 , 68.5 |
|                                                                  |                                  | Severe mental illness                          | <5          | <5.0               | 0.0 , <20.0                             | 9          | 10.5              | 5.2 , 19.4  |
|                                                                  |                                  | Alcohol misuse                                 | 9           | 20.9               | 10.6 , 36.5                             | 25         | 29.1              | 20.0 , 40.0 |
|                                                                  | Prescriptions <sup>c</sup>       | Drug misuse                                    | 6           | 14.0               | 5.8 , 28.6                              | 17         | 19.8              | 12.3 , 30.0 |
|                                                                  |                                  | Psychotropic medications                       | 28          | 65.1               | 49.0 , 78.5                             | 52         | 60.5              | 49.3 , 70.7 |
|                                                                  |                                  | Opiate medications                             | 21          | 48.8               | 33.6 , 64.3                             | 34         | 39.5              | 29.3 , 50.7 |

General note:

1. Column percentages may not add up to 100% since some subgroups are non-mutually exclusive
2. Data are masked to avoid disclosure of small counts (<5) or secondary disclosure of counts in other categories containing small counts

<sup>a</sup> Data sourced from primary, secondary care, and ED mental health assessment data

<sup>b</sup> Data sourced from primary and secondary care data

<sup>c</sup> Data sourced from primary care data only

Table E5. Summary of Fisher's exact tests, likelihood ratio tests and Bayes factor for comparing self-harm characteristics for the ED dataset in Table E4.

| Characteristics                              |                                        | Tests of association ( $p$ -value) |                       | Bayes factor       |                                |
|----------------------------------------------|----------------------------------------|------------------------------------|-----------------------|--------------------|--------------------------------|
|                                              |                                        | Fisher's exact test                | Likelihood ratio test | Range <sup>a</sup> | Evidence category <sup>b</sup> |
| Self-harm during ascertainment period        | Primary care                           | 0.853                              | 0.803                 | 0.156 - 0.413      | - <sup>c</sup>                 |
|                                              | Secondary care                         | <b>&lt;0.001</b>                   | <b>&lt;0.001</b>      | 130.506 - 229.388  | Extreme                        |
|                                              | ED mental health assessment only       | 0.569                              | 0.521                 | 0.181 - 0.476      | - <sup>c</sup>                 |
| Self-harm method during ascertainment period | Overdose/Poisoning                     | 0.230                              | 0.180                 | 0.388 - 0.682      | - <sup>c</sup>                 |
|                                              | Hanging/Strangling                     | >0.999                             | 0.713                 | 0.085 - 0.516      | - <sup>c</sup>                 |
|                                              | Cutting                                | 0.805                              | 0.742                 | 0.186 - 0.327      | - <sup>c</sup>                 |
|                                              | Others/Unknown                         | 0.840                              | 0.784                 | 0.163 - 0.379      | - <sup>c</sup>                 |
|                                              | CCI <sup>d</sup> during history period | 0.682                              | 0.678                 | 0.181 - 0.399      | - <sup>c</sup>                 |
| History of                                   | Self-harm                              | 0.342                              | 0.304                 | 0.248 - 0.650      | - <sup>c</sup>                 |
|                                              | All mental health                      | 0.552                              | 0.501                 | 0.184 - 0.461      | - <sup>c</sup>                 |
|                                              | Common mental disorders                | 0.567                              | 0.443                 | 0.198 - 0.521      | - <sup>c</sup>                 |
|                                              | Severe mental illness                  | 0.334                              | 0.242                 | 0.218 - 0.583      | - <sup>c</sup>                 |
|                                              | Alcohol misuse                         | 0.399                              | 0.316                 | 0.269 - 0.561      | - <sup>c</sup>                 |
|                                              | Drug misuse                            | 0.474                              | 0.408                 | 0.235 - 0.413      | - <sup>c</sup>                 |
|                                              | Psychotropic medications               | 0.702                              | 0.607                 | 0.168 - 0.442      | - <sup>c</sup>                 |
| Opiate medications                           | 0.349                                  | 0.315                              | 0.252 - 0.661         | - <sup>c</sup>     |                                |

<sup>a</sup> Ranges are given based of estimations corresponding to the Poisson, joint multinomial, independent multinomial and hypergeometric sample schemes

<sup>b</sup> Evidence in favor of the alternative hypothesis (dependence of variables) unless otherwise noted

<sup>c</sup> Bayes factor <1, evidence in favor of the null hypothesis (independence of variables)

<sup>d</sup> Charlson comorbidity index

Table E6. Sociodemographics of the enhanced dataset (from ED and SAIL) ascertained during the suicide cluster (DC) or one year before suicide cluster (BC) period.

| Characteristics                                          | Category                  | 1 year before suicide cluster (BC)<br>(n = 209) |       |             | During suicide cluster (DC)<br>(n = 280) |      |             |
|----------------------------------------------------------|---------------------------|-------------------------------------------------|-------|-------------|------------------------------------------|------|-------------|
|                                                          |                           | Person count                                    | %     | 95% CI      | Person count                             | %    | 95% CI      |
| Sex                                                      | Male                      | 83                                              | 39.7  | 33.1 , 46.7 | 112                                      | 40.0 | 34.3 , 46.0 |
|                                                          | Female                    | 126                                             | 60.3  | 53.3 , 66.9 | 168                                      | 60.0 | 54.0 , 65.7 |
| Age (years)                                              | 0-14                      | 13                                              | 6.2   | 3.5 , 10.6  | 25                                       | 8.9  | 6.0 , 13.1  |
|                                                          | 15-34                     | 131                                             | 62.7  | 55.7 , 69.2 | 164                                      | 58.6 | 52.5 , 64.4 |
|                                                          | 35-54                     | 53                                              | 25.4  | 19.7 , 31.9 | 67                                       | 23.9 | 19.1 , 29.4 |
|                                                          | ≥ 55                      | 12                                              | 5.7   | 3.1 , 10.1  | 24                                       | 8.6  | 5.7 , 12.6  |
| WIMD <sup>a</sup> quintile<br>&<br>urban/rural indicator | Q1                        | <20                                             | <10.0 | 0.0 , <15.0 | 20                                       | 7.1  | 4.5 , 11.0  |
|                                                          | Q2                        | 38                                              | 18.2  | 13.3 , 24.2 | 55                                       | 19.6 | 15.3 , 24.9 |
|                                                          | Q3                        | 21                                              | 10.0  | 6.5 , 15.1  | 25                                       | 8.9  | 6.0 , 13.1  |
|                                                          | Q4                        | 51                                              | 24.4  | 18.9 , 30.9 | 67                                       | 23.9 | 19.1 , 29.4 |
|                                                          | Q5 (most deprived)        | 81                                              | 38.8  | 32.2 , 45.7 | 107                                      | 38.2 | 32.4 , 44.2 |
|                                                          | Urban                     | 152                                             | 72.7  | 66.1 , 78.5 | 183                                      | 65.4 | 59.4 , 70.9 |
|                                                          | Rural                     | <60                                             | <30.0 | 0.0 , <35.0 | 91                                       | 32.5 | 27.1 , 38.4 |
|                                                          | Unknown LSOA <sup>b</sup> | <5                                              | <5.0  | 0.0 , <5.0  | 6                                        | 2.1  | 0.9 , 4.8   |

General footnote: Data are masked to avoid disclosure of small counts (<5) or secondary disclosure of counts in other categories containing small counts

<sup>a</sup> Welsh Index of Multiple Deprivation

<sup>b</sup> Lower Super Output Area

Table E7. Summary of Fisher's exact tests, likelihood ratio tests and Bayes factor for comparing sociodemographic characteristics for the enhanced dataset in Table E6.

| Characteristics            | Tests of association ( $p$ -value) |                       | Bayes factor       |                                |
|----------------------------|------------------------------------|-----------------------|--------------------|--------------------------------|
|                            | Fisher's exact test                | Likelihood ratio test | Range <sup>a</sup> | Evidence category <sup>b</sup> |
| Sex                        | >0.999                             | 0.949                 | 0.069 - 0.218      | - <sup>c</sup>                 |
| Age (years)                | 0.425                              | 0.404                 | 0.008 - 0.040      | - <sup>c</sup>                 |
| WIMD <sup>d</sup> quintile | 0.765                              | 0.682                 | 0.000 - 0.004      | - <sup>c</sup>                 |
| Urban/rural indicator      | 0.112                              | 0.086                 | 0.049 - 0.444      | - <sup>c</sup>                 |

<sup>a</sup> Ranges are given based of estimations corresponding to the Poisson, joint multinomial, independent multinomial and hypergeometric sample schemes

<sup>b</sup> Evidence in favor of the alternative hypothesis (dependence of variables) unless otherwise noted

<sup>c</sup> Bayes factor <1, evidence in favor of the null hypothesis (independence of variables)

<sup>d</sup> Welsh index of multiple deprivation

Table E8. Self-harm and clinical outcomes of the enhanced dataset (from ED and SAIL) ascertained during the suicide cluster (DC) or one year before suicide cluster (BC) period.

| Characteristics                                               | Category                                      | 1 year before suicide cluster (BC)<br>(n = 209) |             |                    | During suicide cluster (DC)<br>(n = 280) |             |                    |                    |
|---------------------------------------------------------------|-----------------------------------------------|-------------------------------------------------|-------------|--------------------|------------------------------------------|-------------|--------------------|--------------------|
|                                                               |                                               | Person count                                    | %           | 95% CI             | Person count                             | %           | 95% CI             |                    |
| Self-harm during ascertainment period                         | Primary care                                  | 175                                             | 83.7        | 77.9 , 88.3        | 225                                      | 80.4        | 75.1 , 84.7        |                    |
|                                                               | Secondary care                                | <b>71</b>                                       | <b>34.0</b> | <b>27.7 , 40.9</b> | <b>56</b>                                | <b>20.0</b> | <b>15.6 , 25.3</b> |                    |
|                                                               | ED mental health assessment only <sup>a</sup> | 15                                              | 7.2         | 4.2 , 11.8         | 35                                       | 12.5        | 9.0 , 17.1         |                    |
| Self-harm method during ascertainment period <sup>b</sup>     | Overdose/Poisoning                            | <b>159</b>                                      | <b>76.1</b> | <b>69.6 , 81.6</b> | <b>186</b>                               | <b>66.4</b> | <b>60.5 , 71.9</b> |                    |
|                                                               | Hanging/Strangling                            | <5                                              | <2.0        | 0.0 , <5.0         | 12                                       | 4.3         | 2.3 , 7.6          |                    |
|                                                               | Cutting                                       | 19                                              | 9.1         | 5.7 , 14.0         | 25                                       | 8.9         | 6.0 , 13.1         |                    |
|                                                               | Others/Unknown                                | 76                                              | 36.4        | 29.9 , 43.3        | 125                                      | 44.6        | 38.8 , 50.7        |                    |
| Charlson comorbidity index during history period <sup>d</sup> | 0                                             | 150                                             | 71.8        | 65.1 , 77.7        | 194                                      | 69.3        | 63.5 , 74.6        |                    |
|                                                               | ≥ 1                                           | 59                                              | 28.2        | 22.3 , 34.9        | 86                                       | 30.7        | 25.4 , 36.5        |                    |
| History of                                                    | Conditions <sup>c</sup>                       | Self-harm <sup>b</sup>                          | 100         | 47.8               | 40.9 , 54.8                              | 131         | 46.8               | 40.8 , 52.8        |
|                                                               |                                               | All mental health                               | <b>155</b>  | <b>74.2</b>        | <b>67.6 , 79.8</b>                       | <b>177</b>  | <b>63.2</b>        | <b>57.2 , 68.8</b> |
|                                                               |                                               | Common mental disorders                         | 123         | 58.9               | 51.8 , 65.5                              | 154         | 55.0               | 49.0 , 60.9        |
|                                                               |                                               | Severe mental illness                           | 18          | 8.6                | 5.3 , 13.5                               | 35          | 12.5               | 9.0 , 17.1         |
|                                                               | Prescriptions <sup>d</sup>                    | Alcohol misuse                                  | 56          | 26.8               | 21.0 , 33.4                              | 80          | 28.6               | 23.4 , 34.3        |
|                                                               |                                               | Drug misuse                                     | 40          | 19.1               | 14.2 , 25.3                              | 56          | 20.0               | 15.6 , 25.3        |
|                                                               |                                               | Psychotropic medications                        | 126         | 60.3               | 53.3 , 66.9                              | 159         | 56.8               | 50.8 , 62.6        |
|                                                               |                                               | Opiate medications                              | 86          | 41.1               | 34.5 , 48.2                              | 117         | 41.8               | 36.0 , 47.8        |
| Outcomes during 10-year follow-up                             | Self-harm                                     | Self-harm                                       | 123         | 58.9               | 51.8 , 65.5                              | 157         | 56.1               | 50.0 , 61.9        |
|                                                               |                                               | Mortality                                       |             |                    |                                          |             |                    |                    |
|                                                               |                                               | All-cause                                       | <b>14</b>   | <b>6.7</b>         | <b>3.9 , 11.2</b>                        | <b>34</b>   | <b>12.1</b>        | <b>8.7 , 16.7</b>  |
|                                                               |                                               | Natural cause                                   | 8           | 3.8                | 1.8 , 7.7                                | 22          | 7.9                | 5.1 , 11.8         |
|                                                               |                                               | Unnatural cause                                 | 6           | 2.9                | 1.2 , 6.4                                | <15         | <5.0               | 0.0 , <10.0        |
|                                                               |                                               | Suicide                                         | 5           | 2.4                | 0.9 , 5.8                                | <5          | <5.0               | 0.0 , <5.0         |
|                                                               | Mean age of death                             | 48.2                                            | -           | 37.6 , 58.8        | 51.2                                     | -           | 44.0 , 58.4        |                    |

General note:

1. Column percentages may not add up to 100% since some subgroups are non-mutually exclusive
2. Data are masked to avoid disclosure of small counts (<5) or secondary disclosure of counts in other categories containing small counts

<sup>a</sup> Extracted from the ED dataset

<sup>b</sup> Data sourced from primary, secondary care, and ED mental health assessment

<sup>c</sup> Data for all conditions (except self-harm) sourced from primary and secondary care data

<sup>d</sup> Data sourced from primary care data only





Table E9. Summary of Fisher’s exact tests, likelihood ratio tests and Bayes factor for comparing self-harm and clinical outcomes of the enhanced dataset in Table E8.

| Characteristics                              | Tests of association ( <i>p</i> -value) |                       | Bayes factor       |                                |                    |
|----------------------------------------------|-----------------------------------------|-----------------------|--------------------|--------------------------------|--------------------|
|                                              | Fisher's exact test                     | Likelihood ratio test | Range <sup>a</sup> | Evidence category <sup>b</sup> |                    |
| Self-harm during ascertainment period        | Primary care                            | 0.347                 | 0.337              | 0.138 - 0.269                  | - <sup>c</sup>     |
|                                              | Secondary care                          | <b>0.001</b>          | <b>0.001</b>       | 38.526 - 79.859                | Very strong        |
|                                              | ED mental health assessment only        | 0.070                 | 0.051              | 0.436 - 1.147                  | - <sup>c</sup>     |
| Self-harm method during ascertainment period | Overdose/Poisoning                      | <b>0.021</b>          | <b>0.020</b>       | 13.546 - 28.456                | Strong             |
|                                              | Hanging/Strangling                      | 0.109                 | 0.059              | 0.195 - 1.515                  | - <sup>c</sup>     |
|                                              | Cutting                                 | >0.999                | 0.951              | 0.066 - 0.193                  | - <sup>c</sup>     |
|                                              | Others/Unknown                          | 0.077                 | 0.065              | 0.362 - 1.185                  | - <sup>c</sup>     |
| History of                                   | CCI <sup>b</sup> during history period  | 0.617                 | 0.551              | 0.102 - 0.242                  | - <sup>c</sup>     |
|                                              | Self-harm                               | 0.855                 | 0.816              | 0.067 - 0.228                  | - <sup>c</sup>     |
|                                              | All mental health                       | <b>0.011</b>          | <b>0.010</b>       | 23.851 - 60.579                | Strong/Very strong |
|                                              | Common mental disorders                 | 0.408                 | 0.395              | 0.093 - 0.316                  | - <sup>c</sup>     |
|                                              | Severe mental illness                   | 0.188                 | 0.167              | 0.178 - 0.444                  | - <sup>c</sup>     |
|                                              | Alcohol misuse                          | 0.684                 | 0.664              | 0.098 - 0.218                  | - <sup>c</sup>     |
|                                              | Drug misuse                             | 0.908                 | 0.812              | 0.093 - 0.181                  | - <sup>c</sup>     |
|                                              | Psychotropic medications                | 0.459                 | 0.437              | 0.089 - 0.296                  | - <sup>c</sup>     |
|                                              | Opiate medications                      | 0.926                 | 0.887              | 0.067 - 0.221                  | - <sup>c</sup>     |
|                                              | Outcomes during 10-year follow-up       | Self-harm             | 0.580              | 0.538                          | 0.078 - 0.265      |
| All-cause mortality                          |                                         | <b>0.047</b>          | <b>0.041</b>       | 3.879 - 11.456                 | Moderate/Strong    |
| Natural cause mortality                      |                                         | 0.086                 | 0.060              | 0.292 - 1.207                  | - <sup>c</sup>     |
| Unnatural cause mortality                    |                                         | 0.799                 | 0.665              | 0.044 - 0.325                  | - <sup>c</sup>     |
| Suicide mortality                            |                                         | 0.506                 | 0.436              | 0.043 - 0.525                  | - <sup>c</sup>     |
| Mean age of death                            |                                         |                       | 0.663 <sup>d</sup> | 0.188-0.336 <sup>e</sup>       | - <sup>c</sup>     |

<sup>a</sup> Ranges are given based of estimations corresponding to the Poisson, joint multinomial, independent multinomial and hypergeometric sample schemes

<sup>b</sup> Charlson comorbidity index

<sup>c</sup> Bayes factor <1, evidence in favor of the null hypothesis (independence of variables or no differences in group means)

<sup>d</sup> Based of *p*-values from independent sample *t* test

<sup>e</sup> Based on Bayes factors for independent sample  $t$  test using prior Cauchy distribution with scale parameter of  $\sqrt{2}/2$ , 1, and  $\sqrt{2}$

Table E10. Number of individuals in groups stratified by sex and age for the ED and enhanced dataset.

| Age group                       | Sex    | ED dataset                                        |       |             |                                            |      |             | Enhanced dataset                                   |      |             |                                             |      |             |
|---------------------------------|--------|---------------------------------------------------|-------|-------------|--------------------------------------------|------|-------------|----------------------------------------------------|------|-------------|---------------------------------------------|------|-------------|
|                                 |        | 1 year before<br>suicide cluster (BC)<br>(n = 43) |       |             | During<br>suicide cluster (DC)<br>(n = 86) |      |             | 1 year before<br>suicide cluster (BC)<br>(n = 209) |      |             | During<br>suicide cluster (DC)<br>(n = 280) |      |             |
|                                 |        | Person<br>count                                   | %     | 95% CI      | Person<br>count                            | %    | 95% CI      | Person<br>count                                    | %    | 95% CI      | Person<br>count                             | %    | 95% CI      |
| ≤ 34 years                      |        | 27                                                | 62.8  | 46.7 , 76.6 | 58                                         | 67.4 | 56.4 , 76.9 | 144                                                | 68.9 | 62.1 , 75.0 | 189                                         | 67.5 | 61.6 , 72.9 |
|                                 | Male   | 11                                                | 40.7  | 23.0 , 61.0 | 21                                         | 36.2 | 24.3 , 49.9 | 59                                                 | 41.0 | 32.9 , 49.5 | 71                                          | 37.6 | 30.7 , 44.9 |
|                                 | Female | 16                                                | 59.3  | 39.0 , 77.0 | 37                                         | 63.8 | 50.1 , 75.7 | 85                                                 | 59.0 | 50.5 , 67.1 | 118                                         | 62.4 | 55.1 , 69.3 |
| > 34 years                      |        | 16                                                | 37.2  | 23.4 , 53.3 | 28                                         | 32.6 | 23.1 , 43.6 | 65                                                 | 31.1 | 25.0 , 37.9 | 91                                          | 32.5 | 27.1 , 38.4 |
|                                 | Male   | <5                                                | <30.0 | 0.0 , <55.0 | 11                                         | 39.3 | 22.1 , 59.3 | 24                                                 | 36.9 | 25.6 , 49.8 | 41                                          | 45.1 | 34.7 , 55.8 |
|                                 | Female | <15                                               | <80.0 | 0.0 , <95.0 | 17                                         | 60.7 | 40.7 , 77.9 | 41                                                 | 63.1 | 50.2 , 74.4 | 50                                          | 54.9 | 44.2 , 65.3 |
| Homogeneity of ORs <sup>a</sup> |        | $\chi^2(1) = 1.04, p = 0.308$                     |       |             |                                            |      |             | $\chi^2(1) = 1.43, p = 0.232$                      |      |             |                                             |      |             |
| Ratio of ORs (ROR) <sup>b</sup> |        | ROR = 0.5 (0.1 - 2.2), p = 0.329                  |       |             |                                            |      |             | ROR = 0.6 (0.9 - 1.7), p = 0.236                   |      |             |                                             |      |             |

<sup>a</sup> Based on the Breslow-Day test adjusted by Tarone (1985); ORs: odds ratios

<sup>b</sup> Estimates (95% CIs and p-values) of the sex-by-age group interaction from Firth logistic regression of the likelihood of being in BC or DC group with sex, age-group and the interaction as predictors

Table E11. Summary odd ratios (ORs) from conventional and Firth logistic regression models of all-cause mortality outcome during the 10-year follow-up for the enhanced dataset.

| Variable                                          | Reference group  | Level                    | Model 1 <sup>b</sup>      |                     |                  |                     |                     |                  | Model 2 <sup>c</sup>      |                     |                  |                     |                     |                  |
|---------------------------------------------------|------------------|--------------------------|---------------------------|---------------------|------------------|---------------------|---------------------|------------------|---------------------------|---------------------|------------------|---------------------|---------------------|------------------|
|                                                   |                  |                          | Firth logistic regression |                     |                  | Logistic regression |                     |                  | Firth logistic regression |                     |                  | Logistic regression |                     |                  |
|                                                   |                  |                          | OR                        | 95% CI              | p-value          | OR                  | 95% CI              | p-value          | OR                        | 95% CI              | p-value          | OR                  | 95% CI              | p-value          |
| Group <sup>a</sup> -Sex                           | BC-Male          | BC-Female                | 1.17                      | 0.39 , 3.58         | 0.777            | 1.22                | 0.38 , 3.91         | 0.736            | 1.41                      | 0.45 , 4.47         | 0.555            | 1.50                | 0.44 , 5.08         | 0.513            |
|                                                   |                  | DC-Male                  | <b>3.90</b>               | <b>1.39 , 10.92</b> | <b>0.010</b>     | <b>4.32</b>         | <b>1.47 , 12.65</b> | <b>0.008</b>     | <b>3.85</b>               | <b>1.34 , 11.05</b> | <b>0.012</b>     | <b>4.48</b>         | <b>1.46 , 13.73</b> | <b>0.009</b>     |
|                                                   |                  | DC-Female                | 1.13                      | 0.39 , 3.32         | 0.823            | 1.19                | 0.39 , 3.65         | 0.766            | 1.30                      | 0.43 , 3.99         | 0.641            | 1.40                | 0.43 , 4.55         | 0.581            |
| Age                                               | ≤ 34 years       | > 34 years               | <b>4.41</b>               | <b>2.32 , 8.40</b>  | <b>&lt;0.001</b> | <b>4.65</b>         | <b>2.41 , 9.00</b>  | <b>&lt;0.001</b> | <b>4.07</b>               | <b>1.96 , 8.48</b>  | <b>&lt;0.001</b> | <b>4.54</b>         | <b>2.11 , 9.78</b>  | <b>&lt;0.001</b> |
| WIMD <sup>d</sup> quintile<br>(Q5: most deprived) | Q1               | Q2                       | 0.67                      | 0.16 , 2.80         | 0.586            | 0.71                | 0.16 , 3.22         | 0.656            | 0.65                      | 0.16 , 2.72         | 0.559            | 0.68                | 0.15 , 3.19         | 0.627            |
|                                                   |                  | Q3                       | 2.34                      | 0.56 , 9.70         | 0.242            | 2.59                | 0.57 , 11.75        | 0.217            | 1.99                      | 0.47 , 8.32         | 0.347            | 2.27                | 0.48 , 10.65        | 0.299            |
|                                                   |                  | Q4                       | 1.43                      | 0.38 , 5.34         | 0.596            | 1.59                | 0.39 , 6.46         | 0.516            | 1.14                      | 0.30 , 4.26         | 0.846            | 1.28                | 0.31 , 5.32         | 0.737            |
|                                                   |                  | Q5                       | 1.01                      | 0.29 , 3.55         | 0.986            | 1.12                | 0.30 , 4.28         | 0.864            | 0.83                      | 0.23 , 2.91         | 0.765            | 0.91                | 0.23 , 3.56         | 0.893            |
| Urban/Rural indicator                             | Rural            | Urban                    | 1.55                      | 0.74 , 3.25         | 0.250            | 1.61                | 0.75 , 3.46         | 0.222            | 1.53                      | 0.71 , 3.33         | 0.281            | 1.62                | 0.72 , 3.64         | 0.244            |
| CCI <sup>e</sup> during history period            | CCI = 0          | ≥ 1                      |                           |                     |                  |                     |                     |                  | 1.90                      | 0.98 , 3.70         | 0.058            | 2.00                | 1.00 , 4.00         | 0.050            |
| History of conditions                             | absence of event | Self-harm                |                           |                     |                  |                     |                     |                  | 0.86                      | 0.41 , 1.79         | 0.679            | 0.84                | 0.39 , 1.82         | 0.666            |
|                                                   |                  | All mental health        |                           |                     |                  |                     |                     |                  | 1.74                      | 0.63 , 4.79         | 0.282            | 1.80                | 0.62 , 5.18         | 0.279            |
|                                                   |                  | CMD                      |                           |                     |                  |                     |                     |                  | 0.57                      | 0.22 , 1.52         | 0.265            | 0.57                | 0.21 , 1.56         | 0.273            |
|                                                   |                  | SMI                      |                           |                     |                  |                     |                     |                  | 0.80                      | 0.30 , 2.13         | 0.653            | 0.76                | 0.27 , 2.14         | 0.604            |
|                                                   |                  | Alcohol misuse           |                           |                     |                  |                     |                     |                  | 1.82                      | 0.84 , 3.94         | 0.127            | 1.90                | 0.85 , 4.26         | 0.118            |
| History of medications                            | absence of event | Psychotropic medications |                           |                     |                  |                     |                     |                  | 0.80                      | 0.30 , 2.15         | 0.660            | 0.78                | 0.28 , 2.19         | 0.637            |
|                                                   |                  | Opiate medications       |                           |                     |                  |                     |                     |                  | 1.34                      | 0.63 , 2.85         | 0.439            | 1.37                | 0.63 , 3.00         | 0.426            |

<sup>a</sup> BC: 1 year before suicide cluster; DC: during suicide cluster

<sup>b</sup> Model adjusted for demographic variables: group-sex, age, WIMD quintile, and urban/rural indicator

<sup>c</sup> Variables in Model 1 and further adjusted for WIMD quintile, urban/rural indicator, CCI during history, history of self-harm, all mental health, CMD, SMI, alcohol and drug misuse, psychotropic and opiate medications

<sup>d</sup> Welsh Index of Multiple Deprivation

<sup>e</sup> Charlson comorbidity index

Table E12. Summary of multiple pairwise comparisons of all-cause mortality outcome during the 10-year follow-up among four sex-stratified DC and BC groups from the regression models of for the enhanced dataset.

| Model                | Comparison test                                 | Firth logistic regression |                 |              |                               | Logistic regression |                 |              |                               |
|----------------------|-------------------------------------------------|---------------------------|-----------------|--------------|-------------------------------|---------------------|-----------------|--------------|-------------------------------|
|                      |                                                 | $\chi^2$                  | df <sup>a</sup> | p-value      | Adjusted p-value <sup>b</sup> | $\chi^2$            | df <sup>a</sup> | p-value      | Adjusted p-value <sup>b</sup> |
| Model 1 <sup>c</sup> | DC <sup>d</sup> -Male vs. BC <sup>d</sup> -Male | <b>6.72</b>               | <b>1</b>        | <b>0.010</b> | <b>0.010</b>                  | <b>7.10</b>         | <b>1</b>        | <b>0.008</b> | <b>0.008</b>                  |
|                      | DC-Male vs. BC-Female                           | <b>7.69</b>               | <b>1</b>        | <b>0.006</b> | <b>0.011</b>                  | <b>8.00</b>         | <b>1</b>        | <b>0.005</b> | <b>0.009</b>                  |
|                      | DC-Male vs. DC-Female                           | <b>9.06</b>               | <b>1</b>        | <b>0.003</b> | <b>0.009</b>                  | <b>9.33</b>         | <b>1</b>        | <b>0.002</b> | <b>0.007</b>                  |
|                      | Omnibus test                                    | <b>13.93</b>              | <b>3</b>        | <b>0.003</b> | -                             | <b>14.59</b>        | <b>3</b>        | <b>0.002</b> | -                             |
| Model 2 <sup>e</sup> | DC-Male vs. BC-Male                             | <b>6.28</b>               | <b>1</b>        | <b>0.012</b> | <b>0.024</b>                  | <b>6.90</b>         | <b>1</b>        | <b>0.009</b> | <b>0.026</b>                  |
|                      | DC-Male vs. BC-Female                           | <b>5.12</b>               | <b>1</b>        | <b>0.024</b> | <b>0.024</b>                  | <b>5.55</b>         | <b>1</b>        | <b>0.018</b> | <b>0.018</b>                  |
|                      | DC-Male vs. DC-Female                           | <b>6.46</b>               | <b>1</b>        | <b>0.011</b> | <b>0.033</b>                  | <b>6.86</b>         | <b>1</b>        | <b>0.009</b> | <b>0.018</b>                  |
|                      | Omnibus test                                    | <b>10.75</b>              | <b>3</b>        | <b>0.013</b> | -                             | <b>11.63</b>        | <b>3</b>        | <b>0.009</b> | -                             |

<sup>a</sup> Degree of freedom

<sup>b</sup> p-value adjusted for multiple comparison by Holm method

<sup>c</sup> Model adjusted for demographic variables: group-sex, age, WIMD quintile, and urban/rural indicator

<sup>d</sup> DC: during suicide cluster; BC: 1 year before suicide cluster

<sup>e</sup> Variables in Model 1 and further adjusted for quintile of Welsh Index of Multiple Deprivation, urban/rural indicator, Charlson Comorbidity Index during history, history of self-harm, all mental health, common mental disorders, severe mental illness, alcohol, and drug misuse, psychotropic and opiate medications

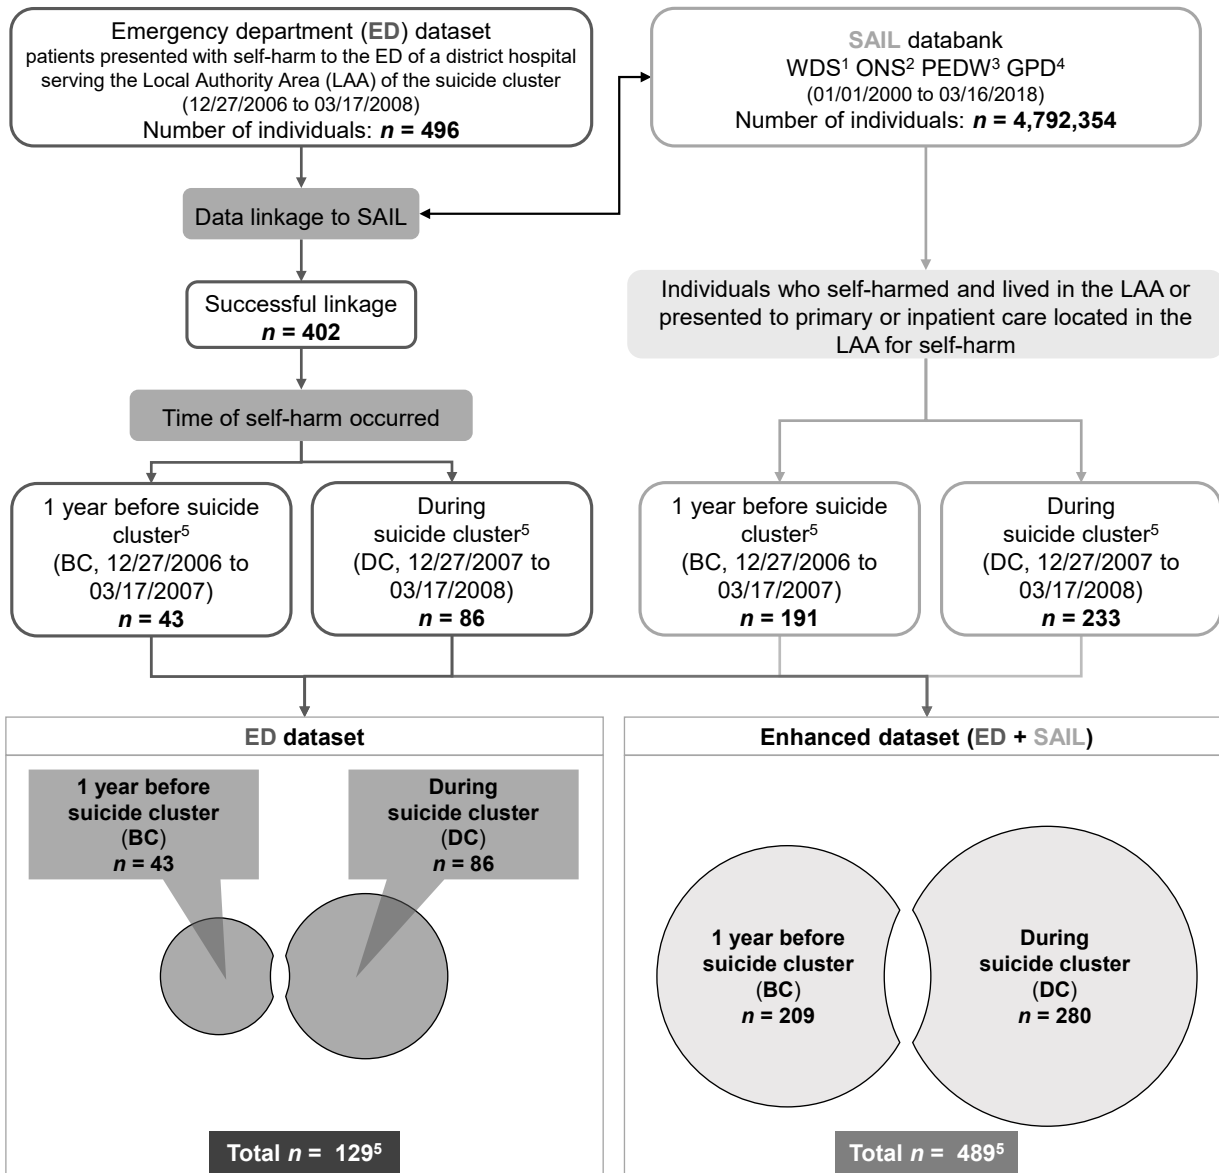

<sup>1</sup> Welsh Demographic Service (demographics and practice registration history)

<sup>2</sup> The Office of National Statistics deaths register

<sup>3</sup> Patient Episode Database for Wales (secondary care)

<sup>4</sup> General Practice Database (Primary care)

<sup>5</sup> Data for Individuals ascertained in both periods (BC and DC) were not analysed in the ED (n < 5) nor the Enhanced dataset (n = 17)

Figure E1. Study flow diagram.
